# Supplementary material for: Plasma extracellular vesicle phenotyping for the differentiation of early-stage lung cancer and benign lung diseases
Source: Royal Society of Chemistry journal article supplement (doi:10.1039/d2nh00570k), 2023-01-01
Supplement: d2nh00570k1.pdf [file d2nh00570k1.pdf]

## Supporting Information

### **Plasma extracellular vesicle phenotyping for the differentiation of early-stage lung cancer and benign lung disease**

Liwen Yuan<sup>1,†</sup>, Yanpin Chen<sup>2,†</sup>, Longfeng Ke<sup>3</sup>, Quan Zhou<sup>4</sup>, Jiayou Chen<sup>5</sup>, Min Fan<sup>1</sup>,  
Alain Wuethrich<sup>4\*</sup>, Matt Trau<sup>4,6\*</sup>, Jing Wang<sup>1\*</sup>

<sup>1</sup>Key Laboratory of OptoElectronic Science and Technology for Medicine of Ministry of Education, Fujian Provincial Key Laboratory of Photonics Technology, Fujian Normal University, Fuzhou 350117, China

<sup>2</sup>Department of Pathology, Clinical Oncology School of Fujian Medical University and Fujian Cancer Hospital, Fuzhou, Fujian 350014, China

<sup>3</sup>Laboratory of Molecular Pathology, Clinical Oncology School of Fujian Medical University and Fujian Cancer Hospital, Fuzhou, Fujian 350014, China

<sup>4</sup>Centre for Personalized Nanomedicine, Australian Institute for Bioengineering and Nanotechnology (AIBN), The University of Queensland, Brisbane, QLD 4072, Australia

<sup>5</sup>Department of Radiology, Clinical Oncology School of Fujian Medical University and Fujian Cancer Hospital, Fuzhou, Fujian 350014, China

<sup>6</sup>School of Chemistry and Molecular Biosciences, The University of Queensland, Brisbane, QLD 4072, Australia

\*Corresponding authors: a.wuethrich@uq.edu.au; m.trau@uq.edu.au;

jing.wang@fjnu.edu.cn

†Equal Contribution

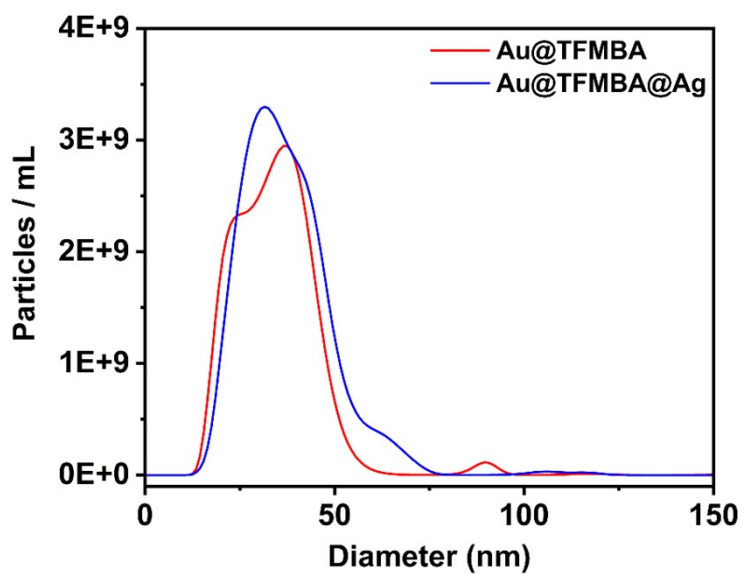

Figure S1. The size distributions of Au@TFMBA and Au@TFMBA@Ag NPs measured by the nanoparticle tracking analysis.

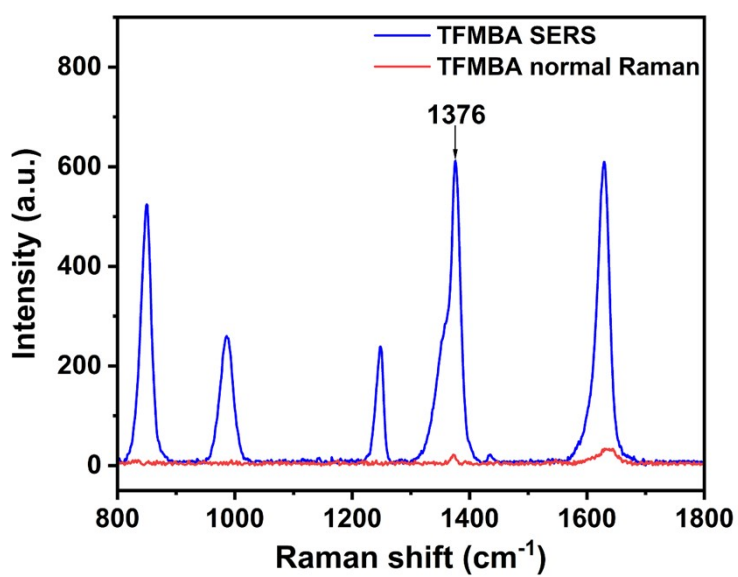

Figure S2. Comparison of Raman signals of Au@TFMBA@Ag NPs with 20 mM TFMBA molecules in water.

### SERS enhancement factor

Au@TFMBA@Ag NPs were used as an example to determine the enhancement factor of Au@Ra@Ag NPs. The enhancement factor was calculated using the equation (1):

$$EF = \frac{I_{SERS} \times C_{Raman}}{I_{Raman} \times C_{SERS}} \quad (1)$$

where  $C_{Raman}$  and  $C_{SERS}$  refer to the concentrations of TFMBA in Raman and SERS measurements;  $I_{SERS}$  and  $I_{Raman}$  represent SERS and Raman intensities of TFMBA at  $1376 \text{ cm}^{-1}$ .

Both SERS nanotags and TFMBA molecules (20 mM) were resuspended in water in a cuvette for measurements. The spectral signal was detected using a portable IM-52 Raman Microscope. Samples were excited by the 785-nm laser wavelength for 1-s integration time. The resulting spectra of SERS nanotags and TFMBA molecules were indicated in Fig. S4, showing intensities of 612 a.u. and 15 a.u., respectively.

Nanoparticle tracking analysis was used for measuring the concentration ( $C_{nanotag}$ ) and the average diameter of SERS nanotag ( $D_{nanotag}$ ), which were  $9.04 \times 10^{10} \pm 1.02 \times 10^{10}$  particles/mL and  $37.4 \text{ nm} \pm 0.1 \text{ nm}$ , respectively.  $C_{SERS}$  was calculated using the equation (2):

$$C_{SERS} = \frac{C_{nanotag} \times S_{nanotag}}{S_{TFMBA}} = \frac{C_{nanotag} \times \pi D_{nanotag}^2}{S_{TFMBA}} \quad (2)$$

Where  $S_{nanotag}$  and  $S_{TFMBA}$  respectively refer to the surface area of SERS nanotags and topological polar surface area of TFMBA ( $0.383 \text{ nm}^2$ )<sup>1</sup>. Accordingly, the  $C_{SERS}$  and EF were calculated to be  $1.02 \times 10^{15}$  molecules/mL and  $4.74 \times 10^5$ , respectively.

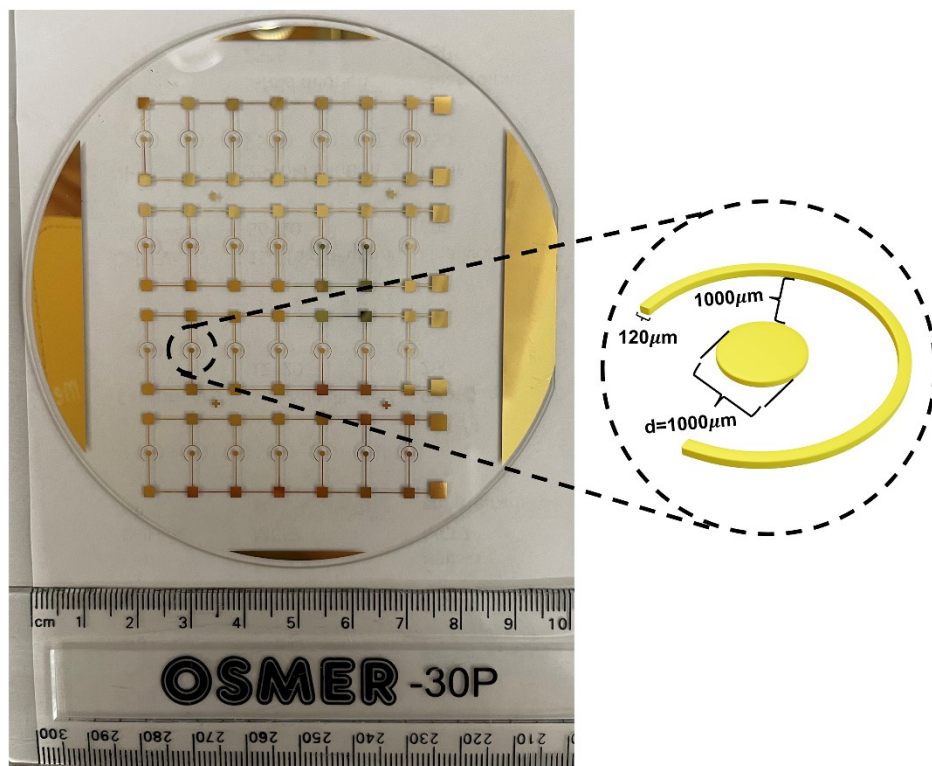

Figure S3. The design of the nanomixing chip. The nanomixing chip was arrayed with multiple pairs of asymmetric gold electrodes consisting of inner circular electrodes (diameter=1000  $\mu\text{m}$ ) and outer ring electrodes (width=120  $\mu\text{m}$ ), which were separated by 1000  $\mu\text{m}$ .

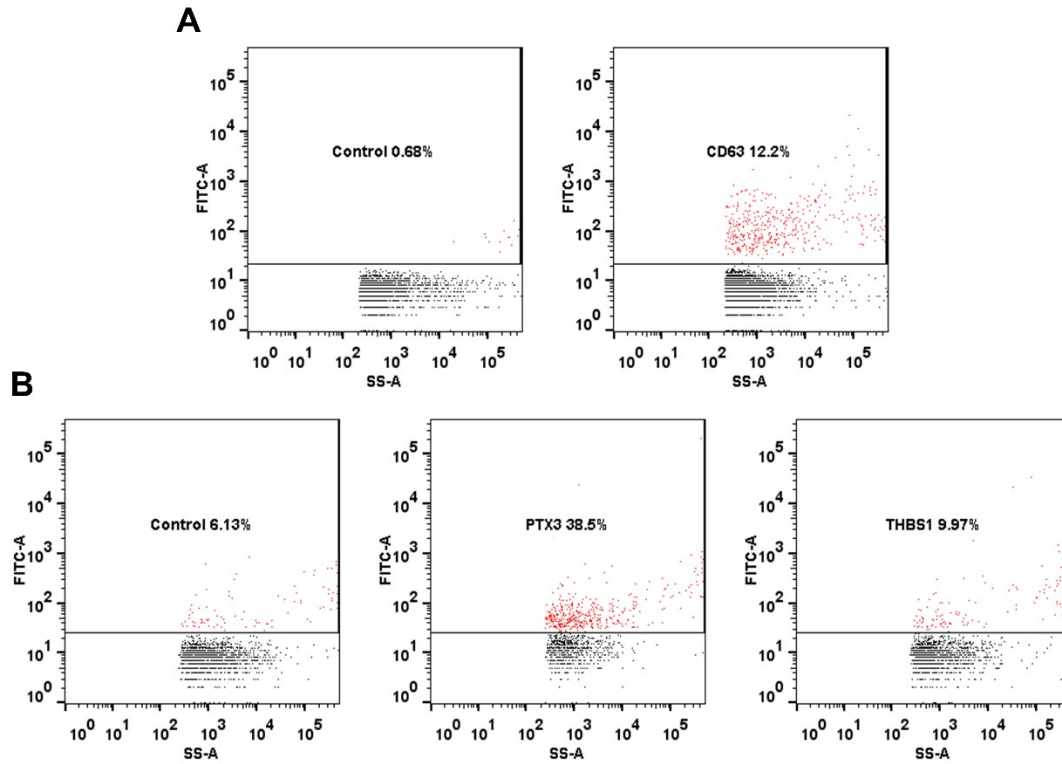

Figure S4. Nanoflow cytometry characterization of A549-derived EV surface proteomics. The expression of (A) CD63, (B) PTX3 and THBS1 on A549-derived EV surfaces. The characterization of CD63, PTX3 and THBS1 expression on EV surfaces was performed individually. The controls in nanoflow cytometry characterization of (A) CD63 and (B) PTX3 and THBS1 on EV surfaces are different, including (A) EVs with FITC-conjugated IgG antibodies and (B) EVs with FITC-conjugated anti-IgG antibodies.

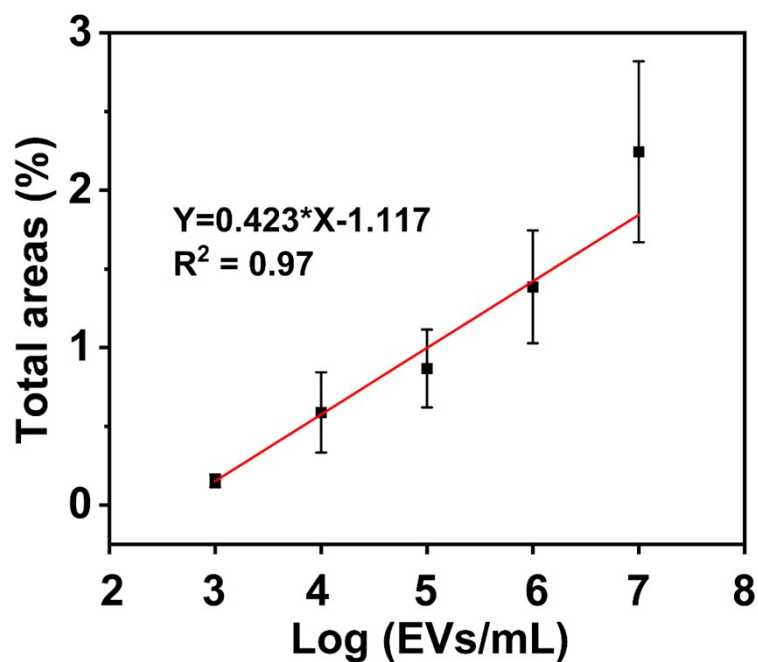

Figure S5. The total percentages of signal dot areas to mapping areas-EV concentration response curve. Data are represented as mean  $\pm$  standard deviation, where error bars represent the standard deviation of three independent experiments (n=3).

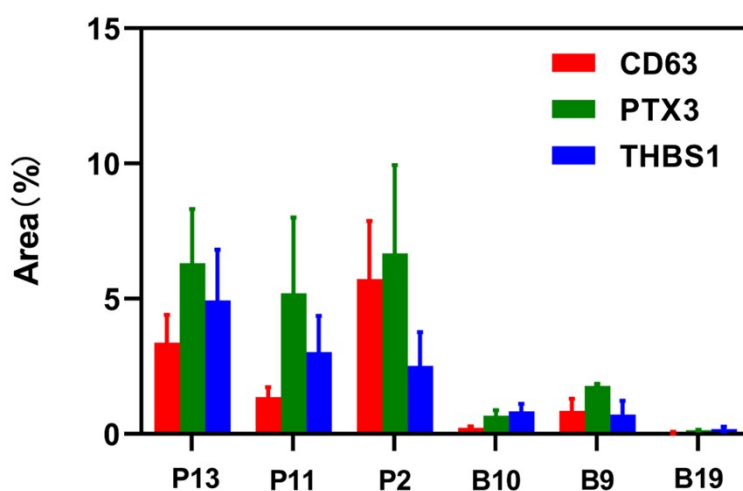

Figure S6. The SERS signatures of representative early-stage lung cancer patients (P13, P11, and P2) and patients with benign lung diseases (B10, B9 and B19). Data are represented as mean  $\pm$  standard deviation, where error bars represent the standard deviation of three independent experiments (n=3).

Table S1. The demographic data, CT nodule classification, and pathological results for individual lung cancer patients, patients with benign lung diseases, and healthy controls.

| Patient ID | Gender | Age | Nodule classification | Stage | Pathology |
|------------|--------|-----|-----------------------|-------|-----------|
| P1         | M      | 65  | Solid                 | IA 3  | IAC       |
| P2         | M      | 48  | Mixed GGN             | IA 2  | MIA       |
| P3         | F      | 62  | Solid                 | IA 2  | MIA       |
| P4         | M      | 70  | Solid                 | IA 2  | MIA       |
| P5         | F      | 54  | Mixed GGN             | IA 2  | MIA       |
| P6         | F      | 61  | Pure GGN              | 0     | AIS       |
| P7         | M      | 40  | Solid                 | 0     | AIS       |
| P8         | F      | 49  | Solid                 | IB    | IAC       |
| P9         | F      | 68  | Mixed GGN             | IA 2  | MIA       |
| P10        | M      | 65  | Unknown               | IA 3  | IAC       |
| P11        | F      | 63  | Pure GGN              | IA    | AIS       |
| P12        | F      | 63  | Mixed GGN             | IA 2  | IAC       |
| P13        | M      | 79  | Solid                 | IA 2  | IAC       |
| P14        | F      | 60  | Mixed GGN             | IA 2  | IAC       |
| P15        | M      | 61  | Solid                 | IB    | IAC       |
| P16        | F      | 64  | Solid                 | IA 1  | IAC       |
| P17        | F      | 60  | Pure GGN              | IA 1  | AIS       |
| P18        | F      | 57  | Mixed GGN             | IA 1  | MIA       |
| P19        | M      | 62  | Mixed GGN             | IA 1  | MIA       |
| P20        | F      | 82  | Mixed GGN             | IA 2  | IAC       |
| P21        | M      | 49  | Mixed GGN             | IA 2  | IAC       |
| P22        | M      | 54  | Pure GGN              | IA 2  | IAC       |
| P23        | M      | 46  | Mixed GGN             | IA 1  | MIA       |
| P24        | M      | 60  | Solid                 | IA 2  | IAC       |

|     |   |    |           |      |     |
|-----|---|----|-----------|------|-----|
| P25 | F | 62 | Solid     | IA 1 | IAC |
| P26 | F | 66 | Mixed GGN | 0    | MIA |
| P27 | F | 45 | Unknown   | 0    | AIS |
| P28 | F | 30 | Solid     | IA 1 | IAC |
| B1  | M | 68 | Solid     |      |     |
| B2  | M | 75 | Mixed GGN |      |     |
| B3  | F | 45 | Solid     |      |     |
| B4  | F | 57 | Solid     |      |     |
| B5  | M | 53 | Solid     |      |     |
| B6  | F | 56 | Solid     |      |     |
| B7  | F | 58 | Solid     |      |     |
| B8  | M | 65 | Solid     |      |     |
| B9  | M | 53 | Pure GGN  |      |     |
| B10 | F | 41 | Solid     |      |     |
| B11 | F | 68 | Solid     |      |     |
| B12 | M | 60 | Solid     |      | N/A |
| B13 | F | 50 | Solid     |      |     |
| B14 | M | 50 | Solid     |      |     |
| B15 | M | 48 | Unknown   |      |     |
| B16 | M | 64 | Solid     |      |     |
| B17 | M | 72 | Solid     |      |     |
| B18 | F | 50 | Solid     |      |     |
| B19 | F | 52 | Mixed GGN |      |     |
| B20 | M | 76 | Solid     |      |     |
| B21 | M | 52 | Solid     |      |     |
| B22 | M | 36 | Solid     |      |     |
| B23 | M | 56 | Solid     |      |     |
| H1  | M | 29 |           |      | N/A |



|     |   |    |
|-----|---|----|
| H2  | M | 22 |
| H3  | F | 24 |
| H4  | M | 20 |
| H5  | M | 28 |
| H6  | F | 25 |
| H7  | M | 23 |
| H8  | M | 29 |
| H9  | F | 38 |
| H10 | M | 47 |
| H11 | F | 24 |
| H12 | F | 26 |
| H13 | F | 25 |
| H14 | M | 31 |
| H15 | F | 24 |
| H16 | M | 32 |
| H17 | M | 24 |
| H18 | M | 26 |
| H19 | F | 24 |
| H20 | M | 41 |
| H21 | M | 46 |
| H22 | M | 20 |
| H23 | M | 31 |
| H24 | F | 30 |
| H25 | F | 26 |
| H26 | F | 29 |

---

Abbreviations: ground-glass nodule, GGN; adenocarcinoma in situ, AIS; minimally invasive adenocarcinoma, MIA; invasive adenocarcinoma, IAC.

#### Reference

1. Y. Liu, N. Lyu, V. K. Rajendran, J. Piper, A. Rodger and Y. Wang, *Anal. Chem.*,

2020, **92**, 5708-5716.
